# Supplementary material for: Effect of non-invasive brain stimulation on motor function after spinal cord injury: a systematic review and meta-analysis
Source: Research Square preprint supplement (doi:10.21203/rs.3.rs-1647919/v1), 2022-09-29
Supplement: Supplementary file 1 [file 35208163e7a369bf9c2e30fc.pdf]

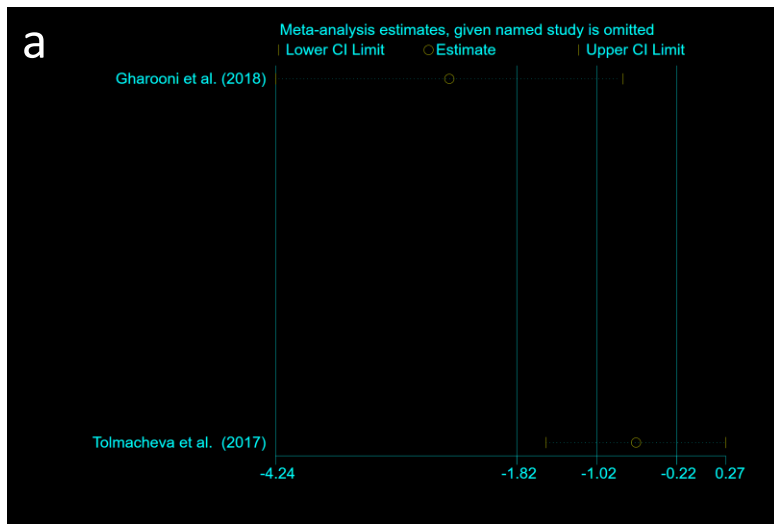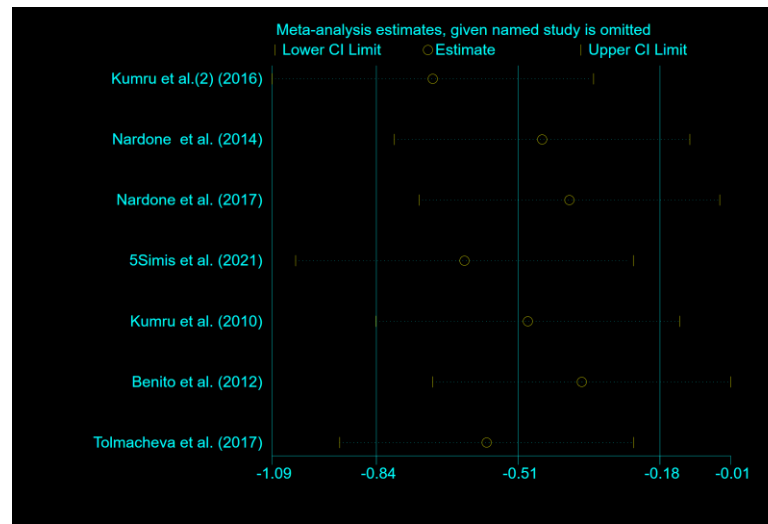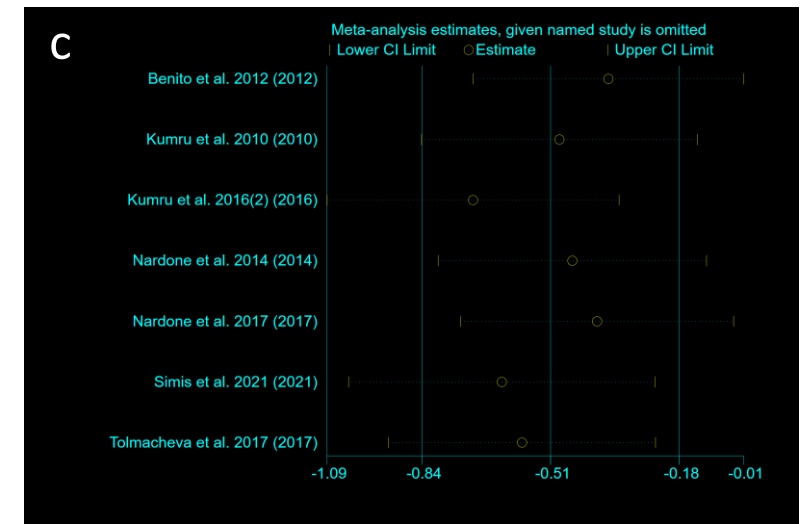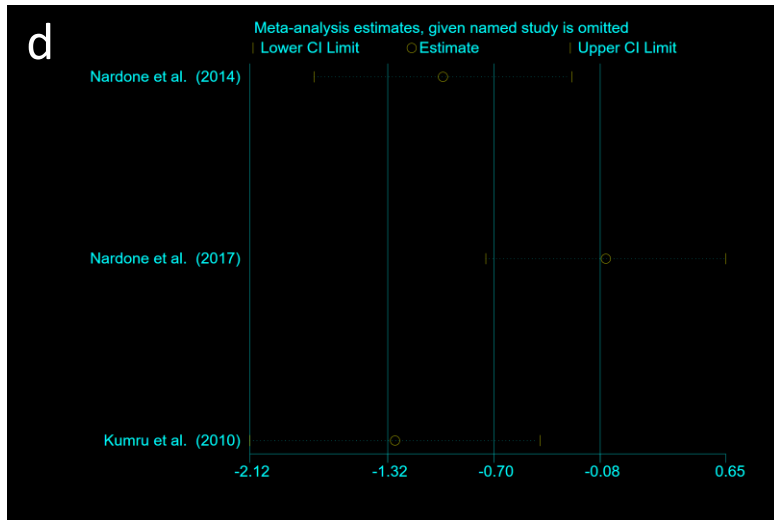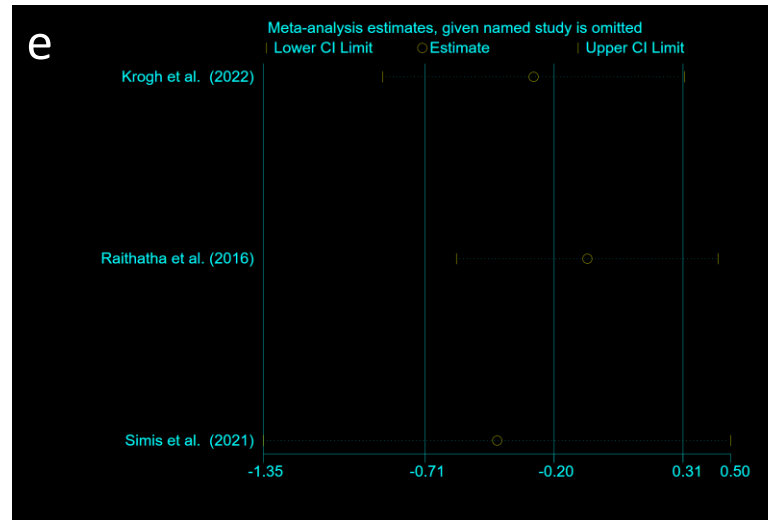

a: Sensitivity analysis of the meta-analysis for the effects of NIBS on UMAS; b: Sensitivity analysis of the meta-analysis for the effects of NIBS on LMAS; c: Sensitivity analysis of the meta-analysis for the effects of NIBS on LEMS; d: Sensitivity analysis of the meta-analysis for the effects of NIBS on H/M; e: Figure S5. Sensitivity analysis of the meta-analysis for the effects of NIBS on 6MWT.
